# Supplementary material for: Deficiency of UBR1, a ubiquitin ligase of the N-end rule pathway, causes pancreatic dysfunction, malformations and mental retardation (Johanson-Blizzard syndrome)
Source: Springer Nature journal article supplement (doi:10.1038/ng1681), 2005-11-20
Supplement: ng1681-S4.pdf [file ng1681-S4.pdf]

**Supplementary Table 2****Exon-flanking primers used for PCR amplification and sequencing of human *UBR1***

| Exon(s)       | Primer sequence forward  | Primer sequence reverse    | product size (bp) |
|---------------|--------------------------|----------------------------|-------------------|
| UBR1_ Ex1     | aacagttcccagcaccaaac     | agacttggctggcagaaatg       | 530               |
| UBR1_ Ex2     | ggtggtatgtgagcagttgc     | tgggtcacacagcaagactc       | 535               |
| UBR1_ Ex3     | ggtcaaggcccaagttatg      | tttctgtaaagcaacacacatcc    | 510               |
| UBR1_ Ex4     | tttctgcacactttgcaatc     | aaaacagcagggttctaactgg     | 543               |
| UBR1_ Ex5     | ttcattcctggacgatgttg     | ggatgagaggctgctaggtc       | 550               |
| UBR1_ Ex6     | aaattagctgggggtgtggtg    | agcaagggtcagtcaacat        | 539               |
| UBR1_ Ex7+8   | gagctcattaagtctttgggctac | gcaacctgaaaattaatcaaag     | 645               |
| UBR1_ Ex9     | cactgtgagaggctgaggtg     | aaagacaacatcctgggttt       | 442               |
| UBR1_ Ex10    | ggaggggtgcagaaaaagag     | ttcaaatgatccaccacct        | 496               |
| UBR1_ Ex11    | ttttgctgatcataatatcttgc  | tcattctgattgacgaggac       | 446               |
| UBR1_ Ex12    | cctgtctaattgggcttggag    | acgcgaggcagtaacagttc       | 547               |
| UBR1_ Ex13    | agttagctgtgacaggcttgg    | ggatctatcaaacaggatgagtg    | 558               |
| UBR1_ Ex14    | ttgaacctcatgcattctgac    | ttccagggaataaacgtgtg       | 532               |
| UBR1_ Ex15    | tgcagtgagctgtgattatgc    | tgggtgggagatgagttacc       | 582               |
| UBR1_ Ex16+17 | gccaaatcaaatgcacaag      | cactcagtaaaatctaggaacacagg | 655               |
| UBR1_ Ex18    | tcactctcgctagtccttt      | tgtaaaagcctcggcaagt        | 562               |
| UBR1_ Ex19    | ttttgacagtcctacatgagacaa | aaggaagggatccagaacaaa      | 544               |
| UBR1_ Ex20    | tgaggggctgttagagaag      | tctgtcttttgaaggtga         | 583               |
| UBR1_ Ex21    | ctttgcccctctctcacag      | tccagatcccttaccattg        | 595               |
| UBR1_ Ex22    | cgaagttggtctccaaaac      | ccctcattctcacccttc         | 381               |
| UBR1_ Ex23    | attgcaatggaattttcataag   | tgatgaagtccatgatgcttg      | 503               |
| UBR1_ Ex24    | ggtgatgtctggctttgtcc     | gttgcccactctcaaaaacc       | 472               |
| UBR1_ Ex25    | ggtttttgagagtgggcaac     | gacctgagatcttcctagctc      | 539               |
| UBR1_ Ex26    | gtcgtgtgcacctctagtc      | aaagtggggcgatcatgtag       | 571               |
| UBR1_ Ex27    | tggactttgatgtccacagg     | gtgagcatggacatggtag        | 447               |
| UBR1_ Ex28    | ggcgtttgtcacagttagag     | tcccagacctcaagtgatcta      | 545               |
| UBR1_ Ex29a   | tgtcatgcagcctgtaatgc     | tgagttgtaattttggtttgc      | 380               |
| UBR1_ Ex29b   | aattttgccatccaaacagc     | tcctatgacctgccaatc         | 359               |
| UBR1_ Ex30    | ggaaaagggggaagcttttaac   | aggaattgaagacattttgagaac   | 568               |
| UBR1_ Ex31    | tgcttgacattcctaagacag    | gcccggccaattattacttt       | 472               |
| UBR1_ Ex32    | ttattggggcaaaaattcca     | tcagccccctcaagtaactg       | 488               |
| UBR1_ Ex33    | ttccttccccttccaaaag      | tcaagaaatctgtactgcaaac     | 383               |
| UBR1_ Ex34    | cctgggagatggaagctaca     | gatggaagcctacactgtttcc     | 321               |
| UBR1_ Ex35    | aaccccttctagctgtgagc     | accagaccaaattggcatgag      | 600               |
| UBR1_ Ex36    | aagattgctgcaggtgcttt     | cgctgtaaagtgcacatgct       | 483               |
| UBR1_ Ex37    | tcagctctgggaaaact        | ttgcatggcttctgtaggtg       | 526               |
| UBR1_ Ex38    | gcagcctttctcagttcag      | gaaaaaggccagaagaggag       | 552               |
| UBR1_ Ex39    | ctgctgcccttcacatttag     | aagcaggtccaagtggcttc       | 488               |
| UBR1_ Ex40    | ggcaacaagagcgaactct      | aaaactgaaactacacccttcc     | 468               |
| UBR1_ Ex41    | tgcccggctaattcagtaga     | atggggagaggagaagtgg        | 499               |
| UBR1_ Ex42    | tgccacctatggtttatag      | tttccacctttaatcag          | 365               |
| UBR1_ Ex43    | tgaaccttaggagggcagaagc   | aggaaaaggacagccactcc       | 420               |
| UBR1_ Ex44    | tcactttgggcagttttga      | ttgaggctgcagttagctta       | 364               |
| UBR1_ Ex45    | tgggcatgtcagatgaagac     | ccatagtgacccccagattg       | 571               |
| UBR1_ Ex46    | ccaccattttcaaggtgtc      | cggtgtctggcctcaattac       | 544               |
| UBR1_ Ex47    | ggctccaggaacatctcaag     | acctggacatggagcaaaag       | 363               |
